# Supplementary material
Source: Royal Society of Chemistry journal article supplement (doi:10.1039/d6cy00225k)
Supplement: d6cy00225k1.pdf [file d6cy00225k1.pdf]

## ESI

# **Regulate Fe/Co–N–C Catalysts by Hydrogen-Assisted Calcination for Enhanced Alkaline Oxygen Reduction**

Yiming Sun<sup>a</sup>, Rufeng Zhang<sup>a</sup>, Huijun Lin<sup>a</sup>, Anmin Liu<sup>a</sup>, Xuefeng Ren<sup>a,\*</sup>

<sup>a</sup> State Key Laboratory of Fine Chemicals, School of Chemical Engineering, Ocean and Life Sciences, Dalian University of Technology, Panjin 124221, China.

E-mail: [liuanmin@dlut.edu.cn](mailto:liuanmin@dlut.edu.cn)

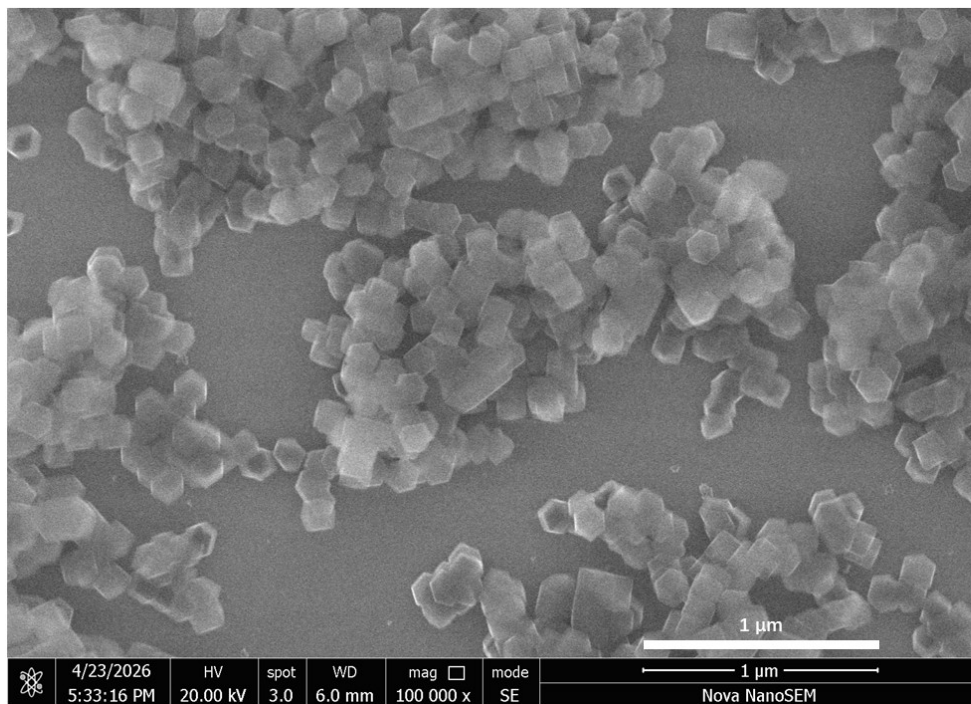

**Fig. S1** SEM image of the electrocatalysts prior to calcination

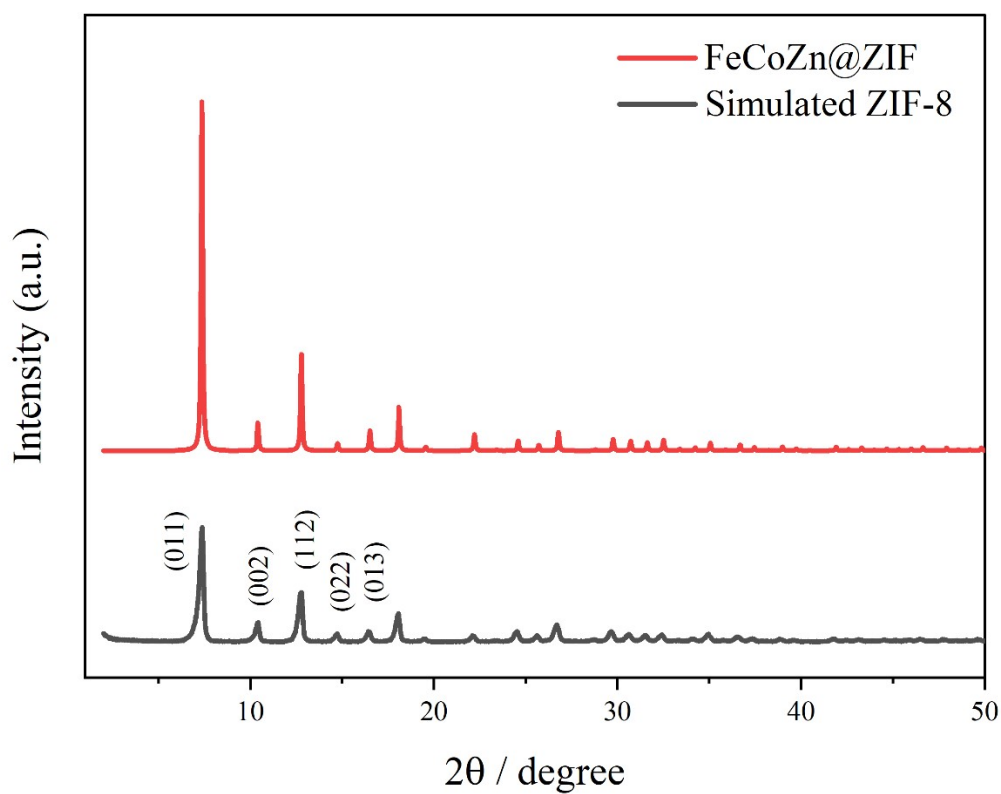

**Fig. S2** XRD patterns of the FeCoZn@ZIF precursor and simulated ZIF-8.
